# Supplementary material
Source: publisher site journal article supplement (http://e-cmh.org/upload/media/cmh-2023-0485-Supplementary-Table-4.pdf)
Supplement: Supplementary file 1 [file cmh-2023-0485-Supplementary-Table-4.pdf]

**Supplementary Table 4.** Clinical outcomes among NAFLD participants by region

|                                 | European region |                   |                                       | North America |                     |                                       | Western Pacific + Southeast Asia |                  |                                       | P-value |
|---------------------------------|-----------------|-------------------|---------------------------------------|---------------|---------------------|---------------------------------------|----------------------------------|------------------|---------------------------------------|---------|
|                                 | Studies         | Events/N          | Incidence rate per 1,000 person-years | Studies       | Events/N            | Incidence rate per 1,000 person-years | Studies                          | Events/N         | Incidence rate per 1,000 person-years |         |
| <b>Mortality</b>                |                 |                   |                                       |               |                     |                                       |                                  |                  |                                       |         |
| All-cause mortality             | 14              | 9,660/<br>140,785 | 19.34 (13.01–25.67)                   | 9             | 64,337/<br>271,898  | 14.99 (8.86–21.12)                    | 10                               | 1,076/<br>98,423 | 7.54 (3.49–11.60)                     | 0.0026  |
| CVD-related mortality           | 8               | 1,378/<br>12,685  | 7.01 (4.19–9.98)                      | 4             | 576/<br>5,366       | 5.22 (1.65–8.78)                      | 7                                | 198/<br>97,419   | 1.30 (0.54–2.05)                      | <0.0001 |
| Non-liver cancer mortality      | 6               | 1,439/<br>12,209  | 4.79 (2.53–7.06)                      | 5             | 555/<br>5,651       | 2.80 (2.49–3.10)                      | 8                                | 423/<br>97,903   | 1.65 (0.82–2.49)                      | <0.0001 |
| Liver-related mortality         | 7               | 667/<br>12,287    | 2.13 (1.53–2.72)                      | 5             | 73/<br>5,651        | 2.47 (0.00–4.98)                      | 10                               | 100/<br>98,423   | 2.80 (0.68–4.93)                      | 0.82    |
| Non-liver cancer                | 2               | 1,555/<br>9,363   | 12.55 (11.93–13.18)                   | 1             | 628/<br>4,722       | 16.62 (15.32–17.93)                   | 7                                | 952/<br>14,700   | 7.49 (6.87–8.11)                      | <0.0001 |
| <b>Liver-related events</b>     |                 |                   |                                       |               |                     |                                       |                                  |                  |                                       |         |
| Any liver event                 | 12              | 5,070/<br>273,854 | 28.58 (6.35–50.80)                    | 10            | 102,838/<br>290,669 | 32.12 (4.19–60.06)                    | 14                               | 294/<br>36,435   | 12.41 (3.01–21.81)                    | 0.22    |
| Fibrosis progression            | 1               | 30/<br>118        | 50.85 (32.65–69.04)                   | 2             | 173/<br>587         | 50.66 (0.00–104.73)                   | 2                                | 50/<br>393       | 51.33 (0.00–118.10)                   | 0.99    |
| Cirrhosis                       | 7               | 3,988/<br>264,519 | 10.86 (5.52–16.19)                    | 5             | 712/<br>24,232      | 5.10 (2.23–7.97)                      | 5                                | 452/<br>19,286   | 9.46 (0.00–20.23)                     | 0.15    |
| Liver transplant                | 2               | 6/<br>222         | 1.85 (0.00–4.33)                      | 4             | 66/<br>1,600        | 25.36 (0.00–74.07)                    | 1                                | 11/<br>284       | 9.11 (3.73–14.50)                     | 0.038   |
| HCC                             | 8               | 703/<br>273,220   | 2.39 (1.01–3.77)                      | 6             | 104/<br>25,280      | 0.37 (0.30–0.46)                      | 12                               | 164/<br>36,042   | 4.08 (1.83–6.34)                      | 0.0001  |
| <b>Cirrhotic decompensation</b> |                 |                   |                                       |               |                     |                                       |                                  |                  |                                       |         |
| Any decompensation              | 5               | 2,783/<br>127,052 | 10.13 (4.28–15.99)                    | 3             | 68/<br>1,422        | 5.32 (0.16–10.48)                     | 4                                | 67/<br>1,206     | 11.35 (0.00–25.15)                    | 0.42    |
| Ascites                         | 3               | 35/<br>766        | 6.40 (0.00–12.81)                     | 3             | 28/<br>1,422        | 2.25 (0.58–3.93)                      | 3                                | 31/<br>932       | 7.31 (0.00–19.13)                     | 0.35    |
| Varices                         | 2               | 6/<br>622         | 1.95 (0.30–3.59)                      | 2             | 31/<br>1120         | 3.51 (0.00–7.48)                      | 3                                | 23/<br>932       | 4.31 (0.57–8.06)                      | 0.45    |
| Encephalopathy                  | 1               | 5/<br>471         | 3.66 (0.45–6.87)                      | 2             | 13/<br>1120         | 1.56 (0.68–2.43)                      | 3                                | 19/<br>932       | 3.85 (0.00–9.16)                      | 0.34    |

Supplementary Table 4. Continued

|                       | European region |                   |                                       | North America |                   |                                       | Western Pacific + Southeast Asia |                 |                                       | P-value |
|-----------------------|-----------------|-------------------|---------------------------------------|---------------|-------------------|---------------------------------------|----------------------------------|-----------------|---------------------------------------|---------|
|                       | Studies         | Events/N          | Incidence rate per 1,000 person-years | Studies       | Events/N          | Incidence rate per 1,000 person-years | Studies                          | Events/N        | Incidence rate per 1,000 person-years |         |
| Metabolic outcomes    |                 |                   |                                       |               |                   |                                       |                                  |                 |                                       |         |
| HTN                   | 6               | 111/<br>965       | 12.98 (4.13–21.84)                    | 1             | 94/<br>420        | 43.04 (34.34–51.74)                   | 5                                | 717/<br>4,206   | 36.57 (17.31–55.84)                   | <0.0001 |
| HLD/DLD               | 2               | 46/<br>329        | 22.00 (0.00–60.45)                    | 3             | 581/<br>8,158     | 21.16 (0.00–47.63)                    | 2                                | 258/<br>1,062   | 39.08 (23.59–54.56)                   | 0.43    |
| DM                    | 7               | 278/<br>1,361     | 14.31 (10.34–18.27)                   | 5             | 961/<br>8,968     | 19.90 (6.63–33.17)                    | 12                               | 3786/<br>29,160 | 22.88 (17.23–28.54)                   | 0.048   |
| Cardiovascular events |                 |                   |                                       |               |                   |                                       |                                  |                 |                                       |         |
| Any CVD event         | 8               | 9,826/<br>144,308 | 20.47 (9.52–31.43)                    | 3             | 1,053/<br>4,456   | 23.05 (6.43–39.67)                    | 5                                | 176/<br>38,631  | 5.09 (1.25–8.94)                      | 0.0059  |
| CAD/CHF               | 3               | 2,871/<br>22,524  | 37.58 (1.49–73.68)                    | 3             | 683/<br>4,456     | 11.48 (0.00–24.32)                    | N/A                              | N/A             | N/A                                   | 0.18    |
| MI                    | 3               | 1,680/<br>142,968 | 2.57 (1.76–3.38)                      | 2             | 126/<br>4,154     | 3.52 (1.10–5.94)                      | 2                                | 114/<br>37,537  | 0.87 (0.00–2.30)                      | 0.073   |
| Stroke                | 5               | 3,320/<br>143,444 | 4.45 (3.49–5.41)                      | 2             | 230/<br>4,154     | 6.45 (2.35–10.55)                     | N/A                              | N/A             | N/A                                   | 0.35    |
| Renal impairment      | 2               | 8,247/<br>48,201  | 14.21 (7.98–20.45)                    | 1             | 5,766/<br>262,619 | 8.20 (7.99–8.41)                      | 2                                | 587/<br>19,784  | 6.62 (2.80–10.44)                     | 0.12    |

NAFLD, non-alcoholic fatty liver disease; CVD, cardiovascular disease; HCC, hepatocellular carcinoma; HTN, Hypertension; HLD, hyperlipidemia; DLD, dyslipidemia; DM, Diabetes mellitus; CAD, coronary artery disease; CHF, congestive heart failure; MI, myocardial infarction.
